# Supplementary material for: Role of Amphipathic Helix of a Herpesviral Protein in Membrane Deformation and T Cell Receptor Downregulation
Source: PubMed Central journal article supplement (PMC2581436; doi:10.1371/journal.ppat.1000209), 2008-11-21

**Figure S4.** Quantification of colocalization of Tip wt and Tip amp1 with early endosomes, late endosome/lysosomes, or CD3 $\zeta$ . Jurkat T cells electroporated with plasmids encoding Tip or Tip amp1 were analyzed for Tip, Tip amp1, EEA1, LAMP2, CD3 $\zeta$  colocalization as described in Fig. 3B. Pearson coefficient (R) values were obtained from 10 to 20 cells as described in materials and methods.

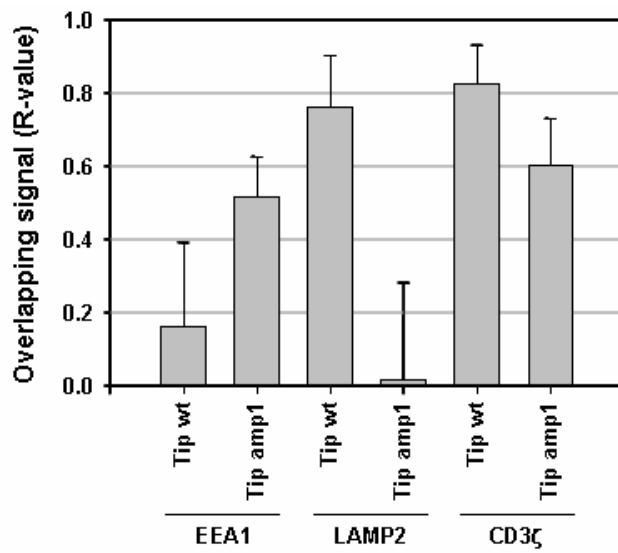

Supplement: ppat.1000209.s004.pdf [file ppat.1000209.s004.pdf]
